# Supplementary material for: CVD synthesis of Cu2O films for catalytic application
Source: Royal Society of Chemistry journal article supplement (doi:10.1039/c5ra05635g), 2015-01-01
Supplement: c5ra05635g1.pdf [file c5ra05635g1.pdf]

## Electronic Supplementary Information (ESI)

### CVD synthesis of Cu<sub>2</sub>O films for catalytic combustion of VOCs

Guan-Fu Pan,<sup>a,b</sup> Shi-Bin Fan,<sup>a,b</sup> Jing Liang,<sup>a,c</sup> Yue-Xi Liu<sup>a,b</sup> and Zhen-Yu Tian<sup>a,\*</sup>

<sup>a</sup> Institute of Engineering Thermophysics, Chinese Academy of Sciences, 11 Beisihuanxi Road, Beijing 100190, China.

<sup>b</sup> University of Chinese Academy of Sciences, Beijing 100049, China

<sup>c</sup> School of Energy, Power and Mechanical Engineering, North China Electric Power University, Beijing 102206, China

\* Corresponding author. Tel: +86-010 82543184, Fax: +86-010 82543184; E-mail: [tianzhenyu@iet.cn](mailto:tianzhenyu@iet.cn).

**Table S1:** Experimental conditions for the deposition of Cu<sub>2</sub>O

|                            |                                          |
|----------------------------|------------------------------------------|
| Precursor                  | Cu(acac) <sub>2</sub>                    |
| Solvent                    | Ethanol                                  |
| Concentration of precursor | 2.5 mM                                   |
| Frequency                  | 4 Hz                                     |
| Opening time               | 2.5 ms                                   |
| Feeding rate               | 1.03 mL/min                              |
| Evaporation temperature    | 180 °C                                   |
| Substrate temperature      | 270 °C                                   |
| System pressure (kPa)      | 3.0                                      |
| N <sub>2</sub> (SLM)       | 0.5                                      |
| O <sub>2</sub> (SLM)       | 1.0                                      |
| Substrates                 | Glass, planar or mesh of stainless steel |

**Table S2:** Chemical composition of Cu<sub>2</sub>O thin films

| Non-etched sample    |         |                |
|----------------------|---------|----------------|
| Element              | Peak BE | Proportion (%) |
| C 1s                 | 284.78  | 17.11          |
| O 1s                 | 529.87  | 43.73          |
| Cu 2p                | 933.62  | 39.16          |
| 5.7 nm-etched sample |         |                |
| Element              | Peak BE | Proportion (%) |
| C 1s                 | 284.80  | 6.12           |
| O 1s                 | 529.61  | 41.99          |
| Cu 2p                | 932.35  | 51.89          |
| 95 nm-etched sample  |         |                |
| Element              | Peak BE | Proportion (%) |
| C 1s                 | 284.78  | 1.54           |
| O 1s                 | 530.14  | 35.62          |
| Cu 2p                | 932.37  | 62.84          |

Note: The subscripts 1s and 2p refer to electron orbits of XPS.

High-resolution entire XPS spectra of Cu<sub>2</sub>O films with different etching depth are shown in Fig. S1. The most obvious peaks come from the presence of copper element consisting of Cu 2p<sub>3/2</sub> and Cu 2p<sub>1/2</sub>. The Cu:O ratio falls down from the surface to the bulk due to the gradual decrease of the absorbed oxygen. Moreover, the carbon component declines from surface to the bulk after 95 nm etching. Hence, it can be inferred that the carbon mainly comes from ambient air and the carbon contamination products is negligible inside the Cu<sub>2</sub>O films.

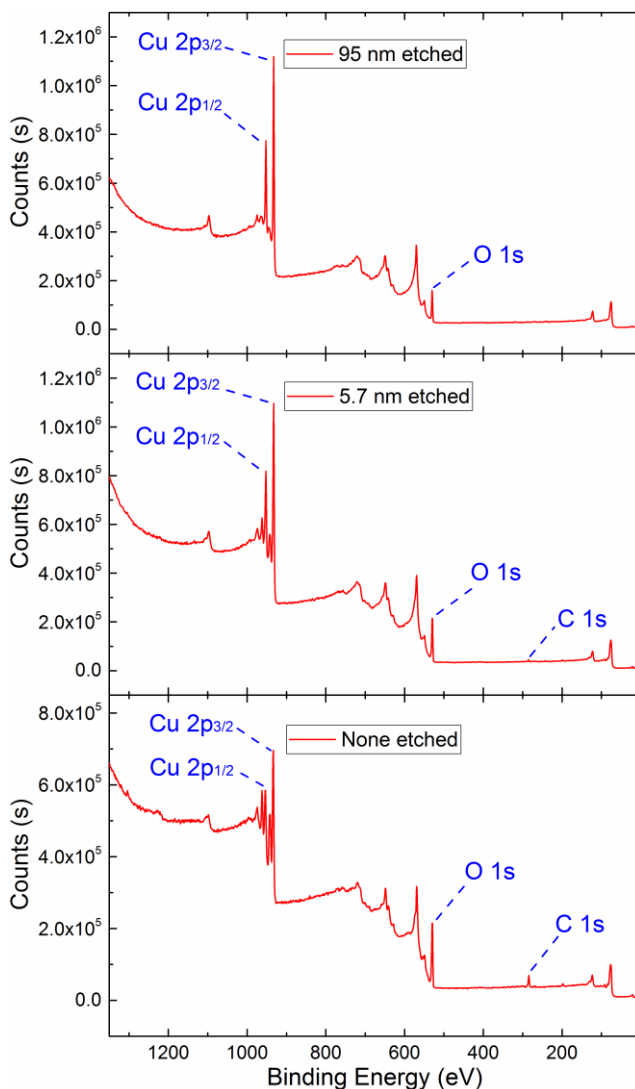

**Fig. S1** Entire XPS spectra of Cu<sub>2</sub>O films with different etching depth.

Cu 2p spectra of Cu<sub>2</sub>O films with different etching depth are shown in Fig. S2. Compared to the standard spectra of both CuO and Cu<sub>2</sub>O, it can be easily found that the Cu<sub>2</sub>O component becomes dominant in the interior of the films deposited referring to the surface. This phenomenon mainly comes from the contaminations on the surface.

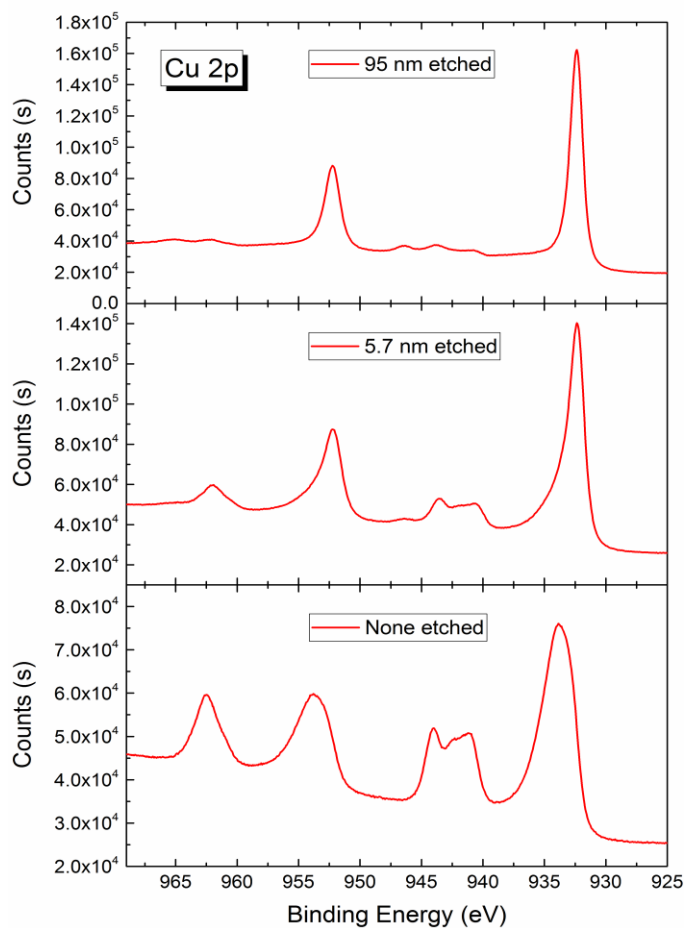

**Fig. S2** Cu 2p spectra of Cu<sub>2</sub>O films with different etching depth.

Figure S3 provides the O 1s and C 1s spectra of Cu<sub>2</sub>O with different etching depth. With the same variation tendency, both the oxygen and carbon component decrease from the surface to the bulk.

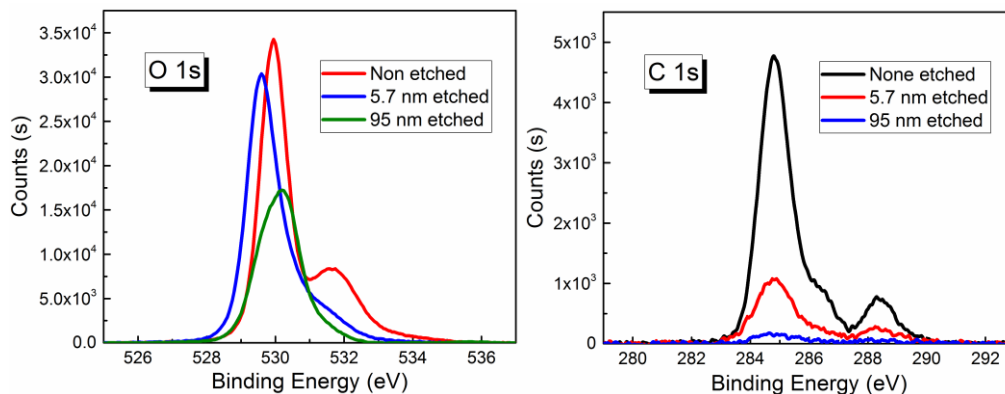

**Fig. S3** O 1s and C 1s spectra of Cu<sub>2</sub>O surfaces with different etching depth.

Figure S4 presents the releases of CO<sub>2</sub> and CO in the oxidation processes on both Cu<sub>2</sub>O-coated mesh and non-coated mesh. The maximum temperatures of CO<sub>2</sub> release in the oxidation processes of C<sub>2</sub>H<sub>2</sub> and C<sub>3</sub>H<sub>6</sub> agree well with the complete oxidation of C<sub>2</sub>H<sub>2</sub> and C<sub>3</sub>H<sub>6</sub>.

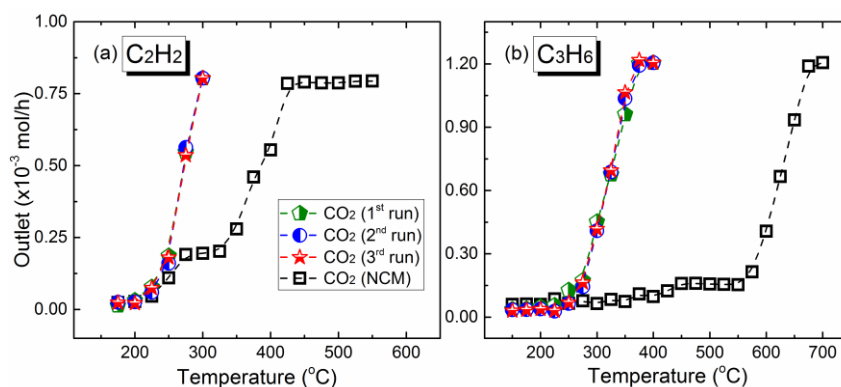

**Fig. S4** Outlet profiles of CO and CO<sub>2</sub> during the catalytic tests.
